# Supplementary material
Source: PubMed Central journal article supplement (PMC8441656)
Supplement: PROT-90-1044-s001.pdf [file PROT-90-1044-s001.pdf]

# **Molecular Dynamics Analysis of a Flexible Loop at the Binding Interface of the SARS-CoV-2 Spike Protein Receptor-Binding Domain**

Jonathan K. Williams<sup>1</sup>, Baifan Wang<sup>1</sup>, Andrew Sam<sup>1</sup>, Cody L. Hoop<sup>1</sup>, David A. Case<sup>1,2</sup> and Jean Baum<sup>1\*</sup>

<sup>1</sup>Department of Chemistry and Chemical Biology, Rutgers University, Piscataway, New Jersey 08854

<sup>2</sup>Institute for Quantitative Biomedicine, Rutgers University, Piscataway, New Jersey 08854

\*Corresponding authors: Jean Baum; Dept. of Chemistry and Chemical Biology, Rutgers University, 123 Bevier Rd., Piscataway, NJ 08854; Tel.: 848-445-5284; Email: jean.baum@chem.rutgers.edu

## **Contents:**

Figure S1-S3

(a) Loop 3 Contacts

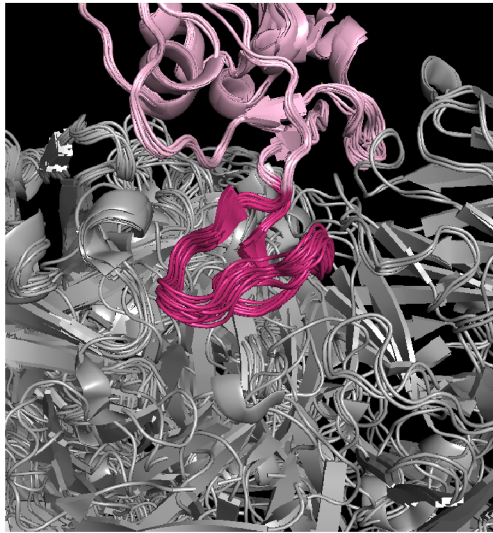

(b) No Loop 3 Contacts

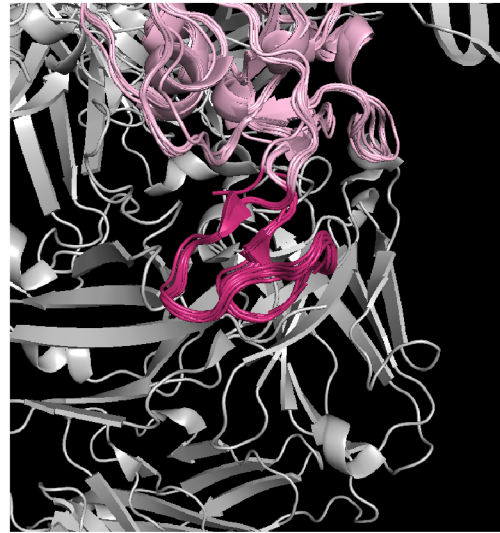

**Figure S1. Antibody-bound structures of the CoV2-RBD in the PDB.** (a) Overlay of structures deposited into the PDB with antibodies that contact Loop 3 of the CoV2-RBD (PDB: 6xc2, 6xc3, 6xc4, 6xc7, 6xe1, 6xkq, 7bz5, 7cdi, 7cdj, 7ch4, 7ch5, 7chb, 7che, 7chf, 7cjf, 7jmo, 7k9z, 7k45). (b) Overlay of structures deposited into the PDB with antibodies that bind to the RBD at locations other than Loop 3 (PDB: 6w41, 6xkp, 6yla, 6ym0, 6zdg, 6zer, 6zfo, 7cah, 7jmw, 7jva, 7jx3). In both panels, structures were aligned to the RBD domain of the CoV2-RBD bound to ACE2 (PDB: 6m0j). The Loop 3 region is highlighted in red, while the remainder of the RBD is in pink. The antibodies in each panel are shown in gray.

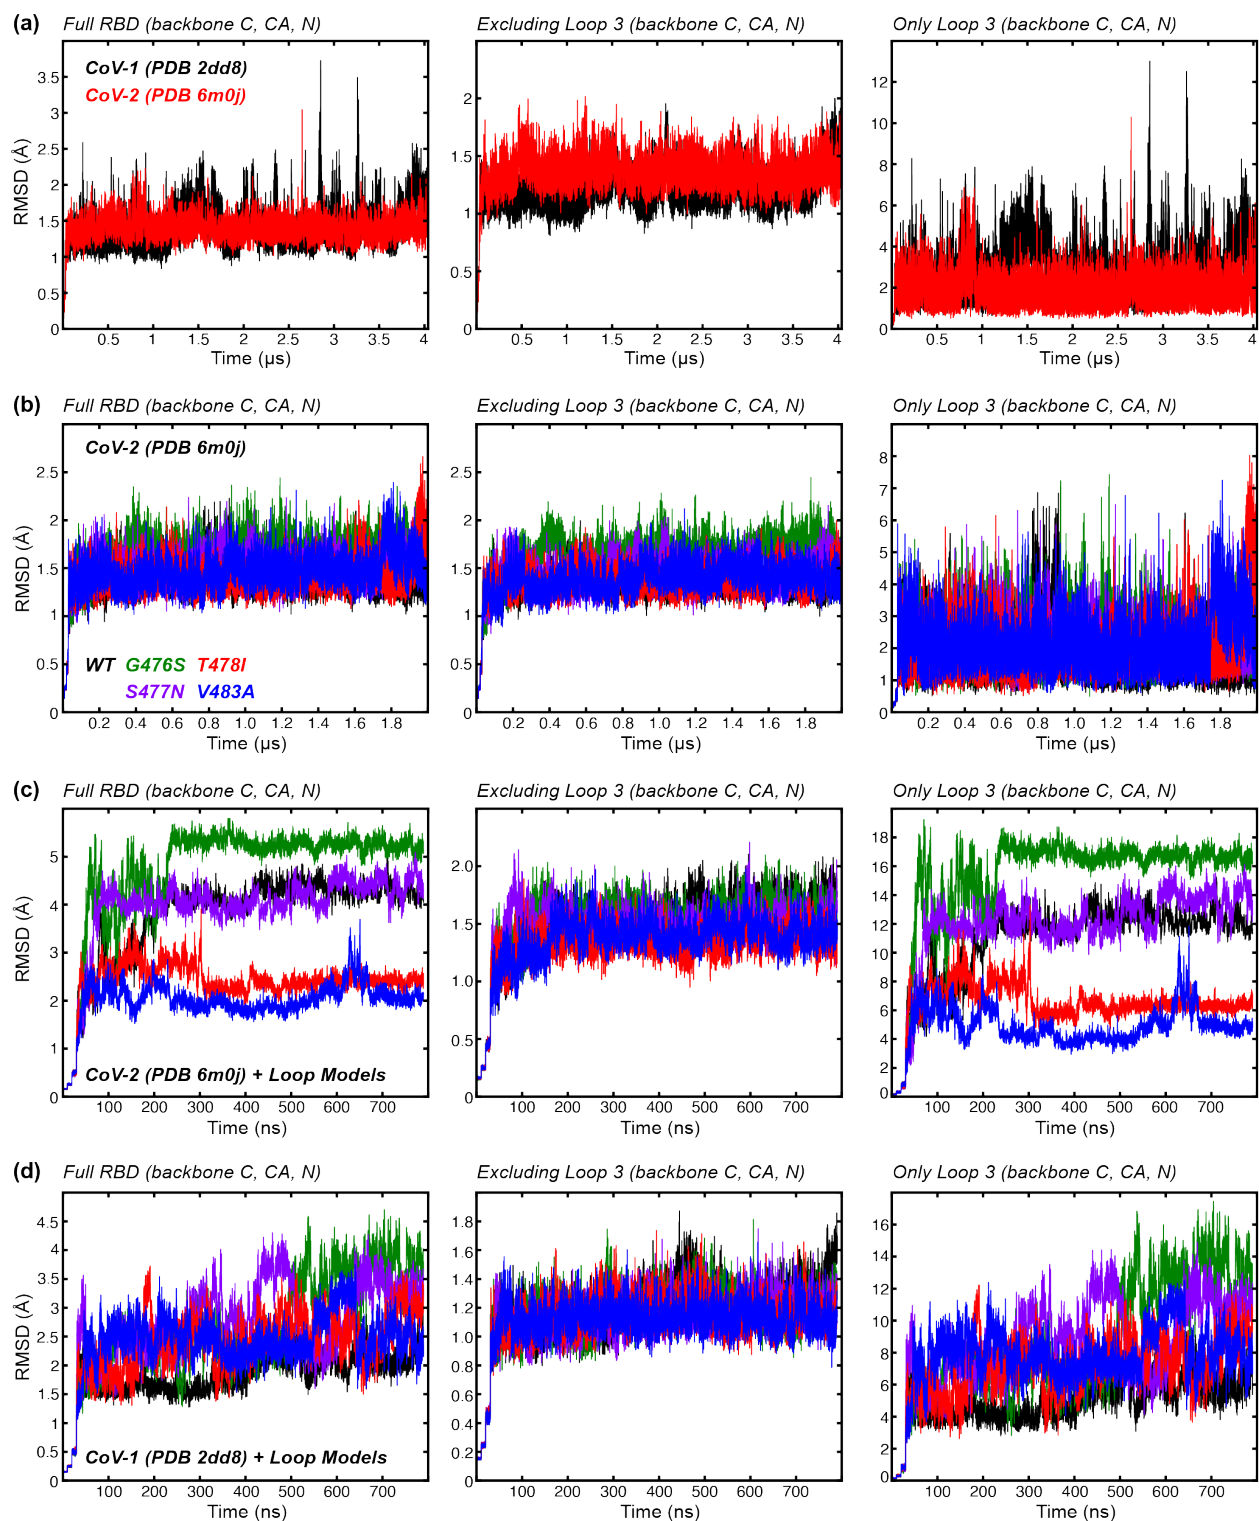

**Figure S2. Root-mean-square deviation (RMSD) of the backbone (N, CA, C) atoms relative to the starting structures. The left column is the RMSD of the full RBD, the center column is the RMSD excluding the residues of Loop 3, and the right column is the RMSD considering only the residues of Loop 3.** RMSD of conformations sampled from: (a) MD simulations of SARS-CoV RBD (black) and SARS-CoV2 RBD (red); (b) MD simulations of CoV2-RBD mutants G476S (green), S477N (purple), T478I (red), and V483A (blue); (c) MD simulations of different loop models of CoV2-RBD; and (d) MD simulations of different loop models of CoV-RBD. The colors used in the RMSD plots match to the same colored structures and RMSF plots of the main text.

**(a) COV1-RBD Loop Models**

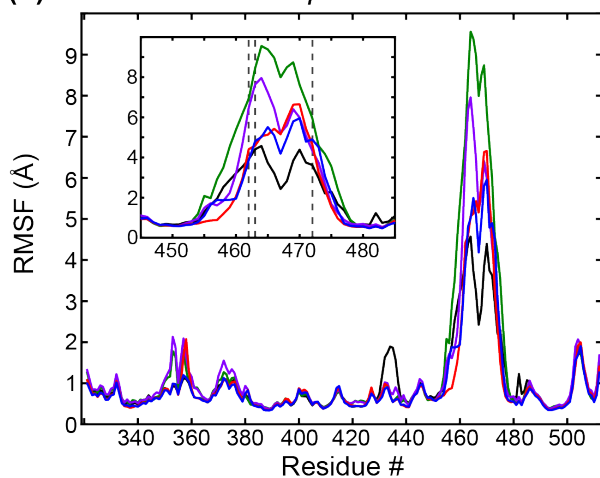

**(b) COV2-RBD Loop Models**

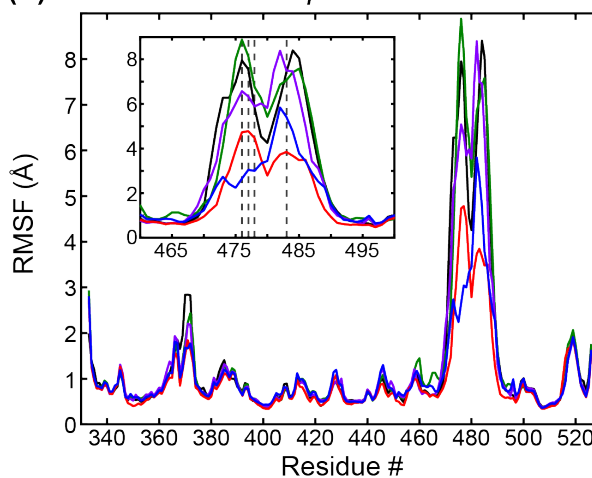

**Figure S3. Per-residue root-mean-square fluctuations (RMSF) of the backbone C, CA, and N of different loop models.** (a) RMSF plots from the 5 different CoV-RBD loop models. (b) RMSF plots from the 5 different CoV2-RBD loop models. The colors used here match with the models used in Figure 4 of the main text.
